# Supplementary material
Source: PubMed Central journal article supplement (PMC3486262)
Supplement: JCM.02300-12_zjm999092065so1.pdf [file JCM.02300-12_zjm999092065so1.pdf]

TABLE S1. Oligonucleotide primers and probes<sup>a</sup>

| Gene     | Name <sup>b</sup> | Target                                                            | Oligonucleotide sequence (5'-3') |
|----------|-------------------|-------------------------------------------------------------------|----------------------------------|
| 16S rDNA | MYC1p             | <i>Mycobacterium</i>                                              | AGTGGCGAACGGGTGAGTAA             |
| 16S rDNA | MYC2p             | <i>Mycobacterium</i>                                              | CGTATCTCAGTCCCAGTGTG             |
| IS6110   | MYC13p            | <i>M. tuberculosis</i> complex                                    | GACCACCAGCACCTAACC               |
| IS6110   | MYC14p            | <i>M. tuberculosis</i> complex                                    | GACCCGCCAGCCCAGGAT               |
| 16S rDNA | MYC3a             | <i>M. tuberculosis</i> complex                                    | GATAGGACCACGGGATGCATGTCT         |
| 16S rDNA | MYC4a             | <i>M. avium</i>                                                   | GGATAGGACCTCAAGACGCATGTCTT       |
| 16S rDNA | MYC5a             | <i>M. intracellulare</i>                                          | GGATAGGACCTTTAGGCGCATGTCT        |
| 16S rDNA | MYC6a             | <i>M. simiae</i> , <i>M. kansasii</i> ,<br><i>M. scrofulaceum</i> | GGACCACTTGGCGCATGCC              |
| 16S rDNA | MYC8a             | <i>M. abscessus</i><br><i>M. chelonae</i>                         | GGATAGGACCACACTTCATGGTGAG        |
| 16S rDNA | MYC10a            | <i>Mycobacterium</i>                                              | GGGATAAGCCTGGGAAACTGGGTCTA       |
| 16S rDNA | MYC17a            | <i>M. xenopi</i>                                                  | ATAGGACCATTCTGCGCATGTGG          |
| 16S rDNA | MYC19a            | <i>M. haemophilum</i>                                             | GGACCTCAAGGCGCATGCCTTTGT         |
| 16S rDNA | MYC31a            | <i>M. fortuitum</i> <sup>c</sup>                                  | GAATATGACCACGCGCTTCATGGTGT       |
| IS6110   | MYC15a            | <i>M. tuberculosis</i> complex                                    | GTGGGTAGCAGACCTCACCTATGTGTC      |
| IS6110   | MYC16a            | <i>M. tuberculosis</i> complex                                    | TCGCCTACGTGGCCTTTGTCA            |

<sup>a</sup> The genes used for primers and probes design were: (i) IS6110 of *M. tuberculosis H37Rv* (GenBank acc. No. X17348) and (ii) the 16S rRNA genes of *M. tuberculosis H37Rv* (GeneID 2700429), *Mycobacterium avium* (GeneID 4530020), *Mycobacterium intracellulare* (GenBank acc. No. AJ536036), *Mycobacterium simiae* (GenBank acc. No. X52931.1), *Mycobacterium kansasii* (GenBank acc. No. AJ536035.1), *Mycobacterium scrofulaceum* (GenBank acc. No. X52924.1), *Mycobacterium abscessus* (GenBank acc. No. AJ536038.1), *Mycobacterium chelonae* (GenBank acc. No. AM884324.1), *Mycobacterium xenopi* (GenBank acc. No. AJ536033.1), *Mycobacterium haemophilum* (GenBank acc. No. X88923.1), *Mycobacterium fortuitum* (GenBank acc. No. X52933)

<sup>b</sup> Final letters “p” and “a” in the name indicate primers and probes respectively

<sup>c</sup> *M. fortuitum* 16S rDNA sequence shows some variability among isolates. Probe is designed to target the most common 16S rDNA sequence present in GenBank for *M. fortuitum* (27/49)
